# Supplementary material for: Sex Differences in Lipid Profile across the Life Span in Patients with Type 2 Diabetes: A Primary Care-Based Study
Source: MDPI journal article supplement (doi:10.3390/jcm10081775), 2021-04-19
Supplement: s1 [file s1]

## Supplementary material

Table S1: Extraction time periods and definitions of variables used in the analyses.

| Variable                                               | Time period                                                                         | Comment                                                                                                                                                                                                                                                                                                                   |
|--------------------------------------------------------|-------------------------------------------------------------------------------------|---------------------------------------------------------------------------------------------------------------------------------------------------------------------------------------------------------------------------------------------------------------------------------------------------------------------------|
| Weight                                                 | Last value in five years before or first value in one year after index date         | Height and weight were used to calculate BMI                                                                                                                                                                                                                                                                              |
| Height                                                 | Last value in 10,000 days before or after index date                                |                                                                                                                                                                                                                                                                                                                           |
| BMI <sup>1</sup>                                       | Last value in five years before or first value in one year after index date         | BMI was extracted if height and/or weight were missing                                                                                                                                                                                                                                                                    |
| HbA1c <sup>1</sup> , smoking status, SBP               | Last value in 6 months before index date or first value in 30 days after index date | Used as entered in the database                                                                                                                                                                                                                                                                                           |
| Serum creatinine* and eGFR                             | Last value in 6 months before index date or first value in 30 days after index date | eGFR was calculated using Modification of Diet in Renal Disease equation or extracted from the database <sup>2</sup> when serum creatinine was missing                                                                                                                                                                    |
| Albumin creatinine ratio and albuminuria concentration | Last value in 6 months before index date or first value in 30 days after index date | Albuminuria was defined as albumin creatinine ratio $\geq 30$ mg/g or albuminuria concentration $\geq 300$ mg                                                                                                                                                                                                             |
| Diabetes duration                                      | On index date                                                                       | Polypharmacy was defined as a prescription for five or more drugs                                                                                                                                                                                                                                                         |
| Polypharmacy and glucose lowering treatment            | Based on prescriptions in the 3 months before index date                            |                                                                                                                                                                                                                                                                                                                           |
| History of CVD                                         | Any recording of CVD before index date.                                             | History of CVD included the presence of angina pectoris, acute myocardial infarction, transient ischemic attack, stroke, atherosclerosis, other ischemic heart diseases and peripheral arterial diseases, abdominal aortic aneurysm, percutaneous transluminal (coronary) angioplasty, and peripheral or coronary bypass. |

\*The standard way of measuring serum creatinine was directly with enzymatic colorimetric methods (Roche elecsys C Module; Roche diagnostics, Switzerland).

<sup>1</sup> Multiple imputation by chained equation was used to impute BMI and HbA1c missing values. The model included LDL-c, HDL-c, TC, TG, and sex. No auxiliary variables were found. We conducted 20 imputations and the results of different datasets were combined by Stata using Rubin's combination rules.

<sup>2</sup> eGFR in the database was calculated using the Modification of Diet in Renal Disease equation.

Table S2: Patient demographics in those not treated and treated with a statin per sex and age group.

|                           |       | Number of patients | Diabetes duration; median | HbA1c; median | BMI in kg/m <sup>2</sup> ; mean | SBP in mmHg; mean | eGFR ≤60 mL/min/1.73m <sup>2</sup> ; N (%) | Albuminuria; N (%) | Polypharmacy; N (%) | Smoking; N (%) | History of CVD; N(%) |          |
|---------------------------|-------|--------------------|---------------------------|---------------|---------------------------------|-------------------|--------------------------------------------|--------------------|---------------------|----------------|----------------------|----------|
|                           |       |                    |                           |               |                                 |                   |                                            |                    |                     |                |                      |          |
| Not treated with a statin | Men   | <40                | 144                       | 1.0           | 7.1                             | 32.1              | 133                                        | 0 (0)              | 2 (3)               | 7 (5)          | 29 (50)              | 2 (1)    |
|                           |       | 40-44              | 214                       | 1.0           | 6.9                             | 31.7              | 137                                        | 2 (1)              | 2 (2)               | 24 (11)        | 33 (42)              | 10 (5)   |
|                           |       | 45-49              | 369                       | 0.9           | 6.8                             | 31.1              | 138                                        | 1 (0)              | 3 (2)               | 47 (13)        | 40 (34)              | 21 (6)   |
|                           |       | 50-54              | 534                       | 1.4           | 6.8                             | 30.8              | 138                                        | 5 (1)              | 4 (2)               | 95 (18)        | 82 (38)              | 47 (9)   |
|                           |       | 55-59              | 684                       | 2.0           | 6.7                             | 29.7              | 140                                        | 12 (2)             | 8 (3)               | 121 (18)       | 67 (27)              | 77 (11)  |
|                           |       | 60-64              | 913                       | 2.6           | 6.7                             | 29.5              | 143                                        | 28 (3)             | 8 (2)               | 203 (22)       | 83 (25)              | 144 (16) |
|                           |       | 65-69              | 826                       | 2.9           | 6.7                             | 29.6              | 145                                        | 50 (7)             | 10 (3)              | 187 (23)       | 59 (20)              | 155 (19) |
|                           |       | 70-74              | 684                       | 3.0           | 6.7                             | 28.3              | 146                                        | 81 (13)            | 12 (4)              | 182 (27)       | 52 (21)              | 181 (26) |
|                           |       | 75-79              | 577                       | 3.9           | 6.7                             | 28.4              | 147                                        | 109 (21)           | 14 (5)              | 226 (39)       | 31 (16)              | 159 (28) |
|                           |       | 80-84              | 361                       | 4.0           | 6.7                             | 27.5              | 144                                        | 115 (35)           | 6 (4)               | 143 (40)       | 19 (14)              | 124 (34) |
|                           |       | ≥85                | 243                       | 5.6           | 6.8                             | 26.3              | 145                                        | 84 (36)            | 13 (11)             | 126 (52)       | 10 (11)              | 94 (39)  |
|                           | Women | <40                | 150                       | 1.3           | 7.0                             | 34.4              | 130                                        | 0 (0)              | 1 (1)               | 24 (16)        | 13 (25)              | 4 (3)    |
|                           |       | 40-44              | 214                       | 1.2           | 6.6                             | 33.3              | 132                                        | 4 (2)              | 1 (1)               | 35 (16)        | 15 (18)              | 10 (5)   |
|                           |       | 45-49              | 350                       | 1.0           | 6.7                             | 33.6              | 136                                        | 5 (2)              | 0 (0)               | 75 (21)        | 35 (26)              | 41 (12)  |
|                           |       | 50-54              | 494                       | 1.4           | 6.8                             | 32.7              | 139                                        | 17 (4)             | 2 (1)               | 129 (26)       | 75 (39)              | 46 (9)   |
|                           |       | 55-59              | 603                       | 1.5           | 6.7                             | 31.8              | 138                                        | 26 (5)             | 3 (2)               | 148 (25)       | 69 (28)              | 53 (9)   |
|                           |       | 60-64              | 806                       | 2.2           | 6.7                             | 31.0              | 142                                        | 51 (7)             | 3(1)                | 229 (28)       | 66 (20)              | 99 (12)  |
|                           |       | 65-69              | 781                       | 2.9           | 6.7                             | 30.8              | 146                                        | 82 (12)            | 6 (2)               | 240 (31)       | 54 (19)              | 128 (16) |
|                           |       | 70-74              | 808                       | 3.1           | 6.7                             | 30.2              | 146                                        | 121 (17)           | 5 (2)               | 335 (41)       | 54 (19)              | 167 (21) |
|                           |       | 75-79              | 788                       | 4.0           | 6.7                             | 29.8              | 146                                        | 176 (24)           | 14 (5)              | 351 (45)       | 41 (14)              | 192 (24) |
|                           |       | 80-84              | 705                       | 4.8           | 6.7                             | 29.0              | 146                                        | 250 (38)           | 10 (4)              | 363 (51)       | 18 (8)               | 203 (29) |
|                           |       | ≥85                | 707                       | 7.4           | 6.8                             | 28.1              | 145                                        | 317 (47)           | 19 (7)              | 406 (67)       | 21 (9)               | 200 (28) |

|                       |       | Treated<br>with a statin<br>out of all in<br>age group<br>(%) | Diabetes<br>duration;<br>median | HbA1c;<br>median | BMI in<br>kg/m <sup>2</sup> ;<br>mean | SBP in<br>mmHg;<br>mean | eGFR ≤60<br>mL/min/1.73m <sup>2</sup> ; N<br>(%) | Albuminuri<br>a; N (%) | Polypharmacy<br>; N (%) | Smoking;<br>N (%) | History of<br>CVD;<br>N(%) |          |          |
|-----------------------|-------|---------------------------------------------------------------|---------------------------------|------------------|---------------------------------------|-------------------------|--------------------------------------------------|------------------------|-------------------------|-------------------|----------------------------|----------|----------|
| Treated with a statin | Men   | <40                                                           | 70                              | 33               | 3.2                                   | 6.7                     | 33.2                                             | 132                    | 0 (0)                   | 2 (5)             | 16 (23)                    | 10 (29)  | 4 (6)    |
|                       |       | 40-44                                                         | 157                             | 42               | 2.9                                   | 6.9                     | 31.8                                             | 134                    | 2 (1)                   | 0 (0)             | 59 (38)                    | 32 (43)  | 17 (11)  |
|                       |       | 45-49                                                         | 308                             | 45               | 2.9                                   | 6.8                     | 31.7                                             | 136                    | 1 (0)                   | 3 (2)             | 117 (38)                   | 54 (47)  | 44 (14)  |
|                       |       | 50-54                                                         | 628                             | 54               | 3.7                                   | 6.8                     | 30.8                                             | 138                    | 13 (2)                  | 6 (2)             | 295 (47)                   | 99 (38)  | 122 (19) |
|                       |       | 55-59                                                         | 934                             | 58               | 4.3                                   | 6.9                     | 30.6                                             | 138                    | 27 (3)                  | 11 (2)            | 476 (51)                   | 113 (33) | 251 (27) |
|                       |       | 60-64                                                         | 1,402                           | 61               | 4.5                                   | 6.8                     | 30.1                                             | 140                    | 56 (4)                  | 27 (4)            | 770 (55)                   | 183 (30) | 425 (30) |
|                       |       | 65-69                                                         | 1,359                           | 62               | 4.7                                   | 6.8                     | 29.8                                             | 144                    | 109 (9)                 | 24 (3)            | 797 (59)                   | 137 (25) | 490 (36) |
|                       |       | 70-74                                                         | 1,139                           | 62               | 4.8                                   | 6.8                     | 28.9                                             | 142                    | 156 (15)                | 24 (4)            | 733 (64)                   | 106 (22) | 503 (44) |
|                       |       | 75-79                                                         | 878                             | 60               | 5.5                                   | 6.8                     | 28.7                                             | 143                    | 199 (24)                | 24 (5)            | 628 (72)                   | 65 (19)  | 438 (50) |
|                       |       | 80-84                                                         | 479                             | 57               | 5.9                                   | 6.8                     | 28.1                                             | 143                    | 159 (35)                | 15 (6)            | 360 (75)                   | 29 (15)  | 261 (54) |
|                       |       | ≥85                                                           | 213                             | 47               | 6.9                                   | 6.9                     | 27.1                                             | 142                    | 80 (40)                 | 10 (10)           | 169 (79)                   | 9 (10)   | 127 (60) |
|                       | Women | <40                                                           | 53                              | 26               | 2.7                                   | 6.7                     | 35.9                                             | 129                    | 0 (0)                   | 0 (0)             | 21 (40)                    | 9 (43)   | 5 (9)    |
|                       |       | 40-44                                                         | 113                             | 35               | 2.7                                   | 6.8                     | 34.3                                             | 131                    | 0 (0)                   | 1 (2)             | 54 (48)                    | 13 (25)  | 19 (17)  |
|                       |       | 45-49                                                         | 266                             | 43               | 3.5                                   | 6.8                     | 34.5                                             | 134                    | 6 (3)                   | 1 (1)             | 133 (50)                   | 35 (30)  | 40 (15)  |
|                       |       | 50-54                                                         | 445                             | 47               | 3.8                                   | 6.8                     | 32.6                                             | 135                    | 13 (3)                  | 8 (4)             | 241 (54)                   | 73 (39)  | 68 (15)  |
|                       |       | 55-59                                                         | 701                             | 54               | 4.2                                   | 6.8                     | 31.7                                             | 138                    | 40 (6)                  | 9 (3)             | 389 (55)                   | 78 (27)  | 134 (19) |
|                       |       | 60-64                                                         | 1,068                           | 57               | 4.6                                   | 6.7                     | 31.3                                             | 140                    | 85 (9)                  | 13 (3)            | 627 (59)                   | 122 (27) | 214 (20) |
|                       |       | 65-69                                                         | 1,237                           | 61               | 5.1                                   | 6.8                     | 30.9                                             | 143                    | 143 (13)                | 11 (2)            | 782 (63)                   | 107 (21) | 321 (26) |
|                       |       | 70-74                                                         | 1,146                           | 59               | 5.5                                   | 6.8                     | 30.6                                             | 144                    | 201 (19)                | 20 (4)            | 794 (69)                   | 86 (19)  | 353 (31) |
|                       |       | 75-79                                                         | 1,116                           | 59               | 6.0                                   | 6.8                     | 29.8                                             | 145                    | 311 (30)                | 23 (5)            | 800 (72)                   | 63 (14)  | 363 (33) |
|                       |       | 80-84                                                         | 770                             | 52               | 7.3                                   | 6.8                     | 29.2                                             | 147                    | 273 (38)                | 21 (6)            | 599 (78)                   | 33 (12)  | 309 (40) |
|                       |       | ≥85                                                           | 412                             | 37               | 9.2                                   | 6.9                     | 28.1                                             | 147                    | 161 (41)                | 11 (6)            | 340 (83)                   | 11 (7)   | 183 (44) |

Table S3: Sex differences in lipid levels across age groups adjusted for BMI in those (A) not treated and (B) treated with a statin. Cholesterol measurements are in mmol/L.

| <b>A – Not treated with a statin</b> |       | <40              | 40-44            | 45-49            | 50-54            | 55-59            | 60-64            | 65-69            | 70-74            | 75-79            | 80-84            | ≥85              |
|--------------------------------------|-------|------------------|------------------|------------------|------------------|------------------|------------------|------------------|------------------|------------------|------------------|------------------|
| LDL-c; mean±SE                       | Men   | 3.3±.08          | 3.4±.06          | 3.3±.05          | 3.4±.04          | 3.3±.04          | 3.2±.03          | 3.3±.03          | 3.2±.04          | 3.1±.04          | 3.1±.05          | 2.9±.06          |
|                                      | Women | 3.1±.08          | 3.1±.06          | 3.3±.05          | 3.5±.04          | 3.5±.04          | 3.6±.03          | 3.5±.03          | 3.4±.03          | 3.3±.03          | 3.3±.04          | 3.2±.04          |
|                                      | p     | <b>0.039</b>     | <b>0.004</b>     | 0.701            | <b>0.012</b>     | <b>&lt;0.001</b> | <b>&lt;0.001</b> | <b>&lt;0.001</b> | <b>&lt;0.001</b> | <b>&lt;0.001</b> | <b>0.002</b>     | <b>&lt;0.001</b> |
| HDL-c; mean±SE                       | Men   | 1.0±.03          | 1.1±.02          | 1.1±.02          | 1.1±.01          | 1.2±.01          | 1.2±.01          | 1.2±.01          | 1.2±.01          | 1.2±.01          | 1.2±.02          | 1.2±.02          |
|                                      | Women | 1.2±.03          | 1.3±.02          | 1.3±.02          | 1.3±.02          | 1.4±.01          | 1.4±.01          | 1.4±.01          | 1.4±.01          | 1.4±.01          | 1.4±.01          | 1.3±.01          |
|                                      | p     | <b>&lt;0.001</b> |
| TG; mean±SE                          | Men   | 2.4±.09          | 2.5±.08          | 2.5±.06          | 2.3±.05          | 2.0±.04          | 1.9±.04          | 1.8±.04          | 1.7±.04          | 1.8±.05          | 1.6±.06          | 1.6±.07          |
|                                      | Women | 1.7±.09          | 1.7±.08          | 1.8±.06          | 1.9±.05          | 1.8±.05          | 1.8±.04          | 1.8±.04          | 1.8±.04          | 1.8±.04          | 1.8±.04          | 1.7±.04          |
|                                      | p     | <b>&lt;0.001</b> | <b>&lt;0.001</b> | <b>&lt;0.001</b> | <b>&lt;0.001</b> | 0.068            | 0.564            | 0.645            | 0.056            | 0.687            | 0.073            | 0.475            |
| TC; mean±SE                          | Men   | 5.3±.09          | 5.4±.07          | 5.3±.06          | 5.4±.05          | 5.2±.04          | 5.1±.04          | 5.1±.04          | 5.0±.04          | 5.0±.05          | 4.9±.06          | 4.7±.07          |
|                                      | Women | 5.0±.09          | 5.0±.07          | 5.2±.06          | 5.5±.05          | 5.6±.04          | 5.6±.04          | 5.6±.04          | 5.5±.04          | 5.4±.04          | 5.3±.04          | 5.1±.04          |
|                                      | p     | <b>0.030</b>     | <b>0.001</b>     | 0.259            | <b>0.008</b>     | <b>&lt;0.001</b> |
| Non-HDL-c; mean±SE                   | Men   | 4.2±.09          | 4.3±.07          | 4.2±.06          | 4.2±.05          | 4.0±.04          | 3.9±.04          | 4.0±.04          | 3.8±.04          | 3.8±.05          | 3.7±.06          | 3.5±.07          |
|                                      | Women | 3.8±.09          | 3.7±.07          | 3.9±.06          | 4.2±.05          | 4.2±.04          | 4.2±.04          | 4.1±.04          | 4.1±.04          | 4.0±.04          | 3.9±.04          | 3.8±.04          |
|                                      | p     | <b>&lt;0.001</b> | <b>&lt;0.001</b> | <b>&lt;0.001</b> | 0.591            | <b>&lt;0.001</b> | <b>&lt;0.001</b> | <b>0.001</b>     | <b>&lt;0.001</b> | <b>0.001</b>     | <b>0.002</b>     | <b>&lt;0.001</b> |
| <b>B – Treated with a statin</b>     |       |                  |                  |                  |                  |                  |                  |                  |                  |                  |                  |                  |
| LDL-c; mean±SE                       | Men   | 2.3±.09          | 2.4±.06          | 2.4±.04          | 2.4±.03          | 2.3±.02          | 2.3±.02          | 2.2±.02          | 2.2±.02          | 2.1±.02          | 2.0±.03          | 2.0±.05          |
|                                      | Women | 2.4±.10          | 2.4±.07          | 2.4±.05          | 2.4±.03          | 2.4±.03          | 2.4±.02          | 2.4±.02          | 2.4±.02          | 2.3±.02          | 2.2±.03          | 2.1±.04          |
|                                      | p     | 0.534            | 0.820            | 0.767            | 0.747            | <b>0.004</b>     | <b>&lt;0.001</b> | <b>&lt;0.001</b> | <b>&lt;0.001</b> | <b>&lt;0.001</b> | <b>&lt;0.001</b> | 0.116            |
| HDL-c; mean±SE                       | Men   | 1.1±.04          | 1.1±.03          | 1.1±.02          | 1.1±.01          | 1.1±.01          | 1.2±.01          | 1.2±.01          | 1.2±.01          | 1.2±.01          | 1.2±.01          | 1.2±.02          |
|                                      | Women | 1.3±.04          | 1.2±.03          | 1.3±.02          | 1.3±.02          | 1.3±.01          | 1.4±.01          | 1.4±.01          | 1.4±.01          | 1.4±.01          | 1.4±.01          | 1.4±.02          |
|                                      | p     | <b>0.001</b>     | <b>&lt;0.001</b> |
| TG; mean±SE                          | Men   | 2.2±.12          | 2.4±.08          | 2.2±.06          | 2.1±.04          | 1.9±.03          | 1.8±.03          | 1.7±.03          | 1.6±.03          | 1.6±.03          | 1.6±.05          | 1.5±.07          |
|                                      | Women | 1.8±.14          | 1.7±.10          | 1.8±.06          | 1.8±.05          | 1.8±.04          | 1.8±.03          | 1.7±.03          | 1.7±.03          | 1.6±.03          | 1.6±.04          | 1.6±.05          |
|                                      | p     | <b>0.028</b>     | <b>&lt;0.001</b> | <b>&lt;0.001</b> | <b>&lt;0.001</b> | <b>0.006</b>     | 0.867            | 0.158            | 0.089            | 0.143            | 0.491            | 0.254            |
| TC; mean±SE                          | Men   | 4.1±.11          | 4.3±.07          | 4.3±.05          | 4.2±.04          | 4.2±.03          | 4.1±.02          | 4.0±.02          | 4.0±.03          | 3.9±.03          | 3.8±.04          | 3.7±.06          |
|                                      | Women | 4.3±.12          | 4.2±.08          | 4.3±.05          | 4.4±.04          | 4.4±.03          | 4.5±.03          | 4.4±.03          | 4.4±.03          | 4.3±.03          | 4.2±.03          | 4.1±.04          |
|                                      | p     | 0.385            | 0.811            | 0.567            | <b>0.024</b>     | <b>&lt;0.001</b> |
| Non-HDL-c; mean±SE                   | Men   | 3.1±.10          | 3.2±.07          | 3.2±.05          | 3.1±.03          | 3.0±.03          | 2.9±.02          | 2.9±.02          | 2.8±.03          | 2.7±.03          | 2.6±.04          | 2.5±.06          |
|                                      | Women | 3.0±.12          | 3.0±.08          | 3.0±.05          | 3.0±.04          | 3.1±.03          | 3.1±.03          | 3.0±.02          | 3.0±.03          | 2.9±.03          | 2.8±.03          | 2.7±.04          |
|                                      | p     | 0.707            | 0.063            | <b>0.006</b>     | 0.059            | 0.141            | <b>&lt;0.001</b> | <b>&lt;0.001</b> | <b>&lt;0.001</b> | <b>&lt;0.001</b> | <b>&lt;0.001</b> | <b>0.044</b>     |

p<0.05 was considered statistically significant (marked bold); SE = standard error; LDL-c = low-density lipoprotein cholesterol; HDL-c = high-density lipoprotein cholesterol; TG = triglycerides; TC = total cholesterol

(A)

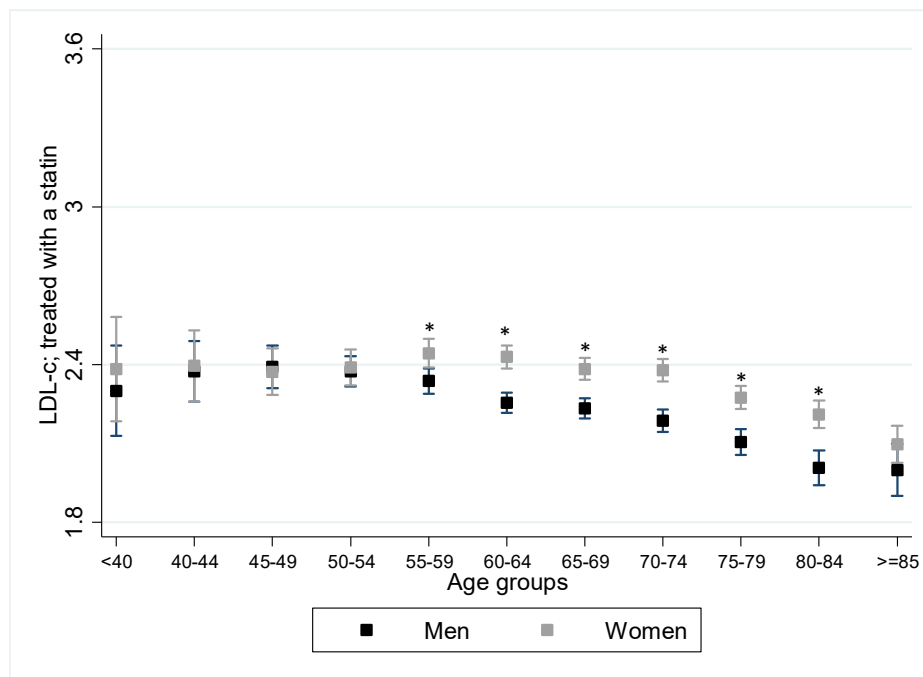

(B)

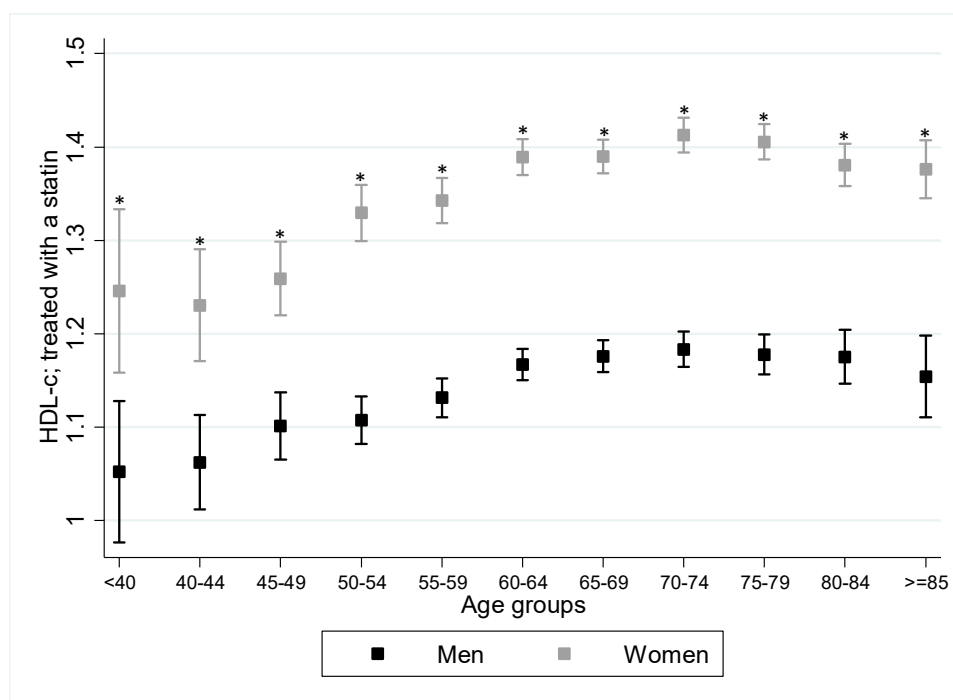

(C)

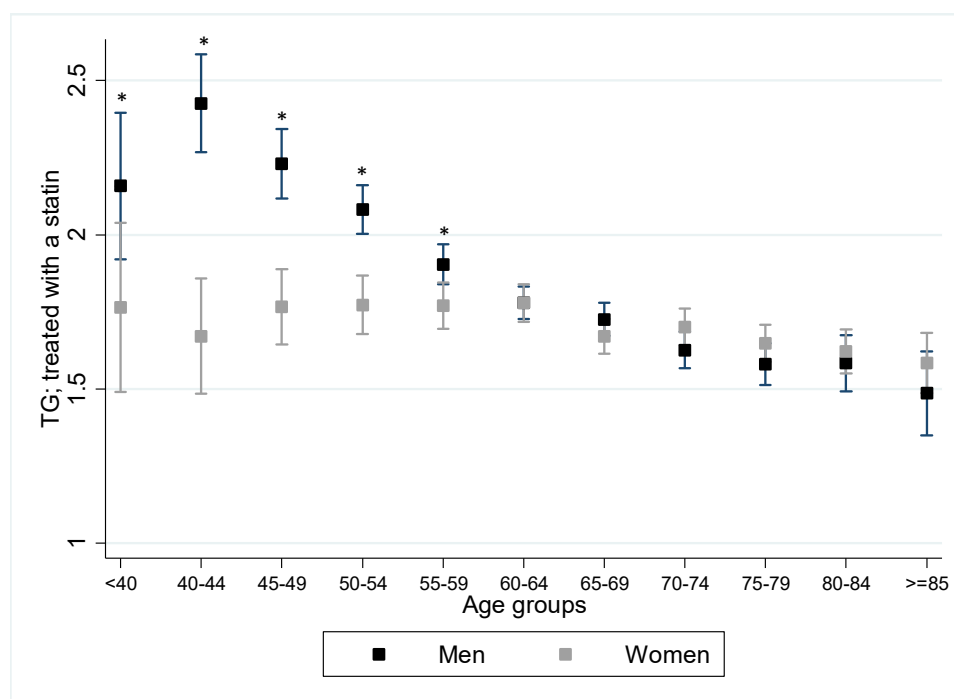

Figure S1: Mean lipid levels with 95% CIs for men and women per age group treated by a statin of (A) low-density lipoprotein cholesterol (LDL-c), (B) high-density lipoprotein cholesterol (HDL-c) and (C) triglycerides (TG). Cholesterol measurements are in mmol/L. Values are adjusted for body mass index and statin dose (moderate versus high; dose was not available for 8 patients); TG values are additionally adjusted for glycated hemoglobin A1c. \* $p < 0.05$  between men and women.

(A)

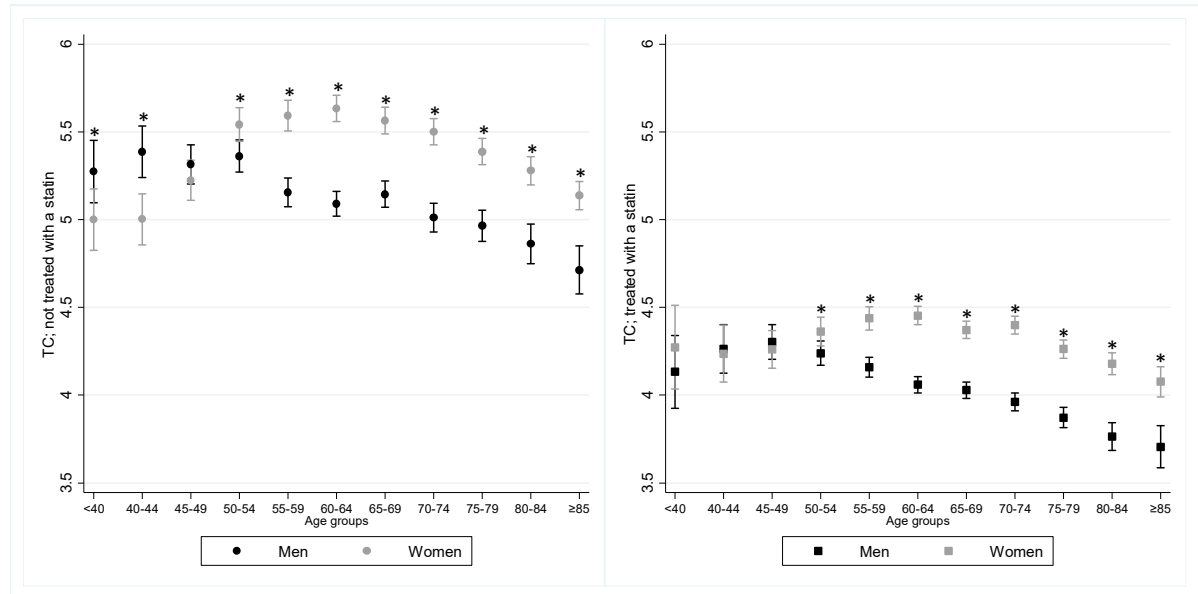

(B)

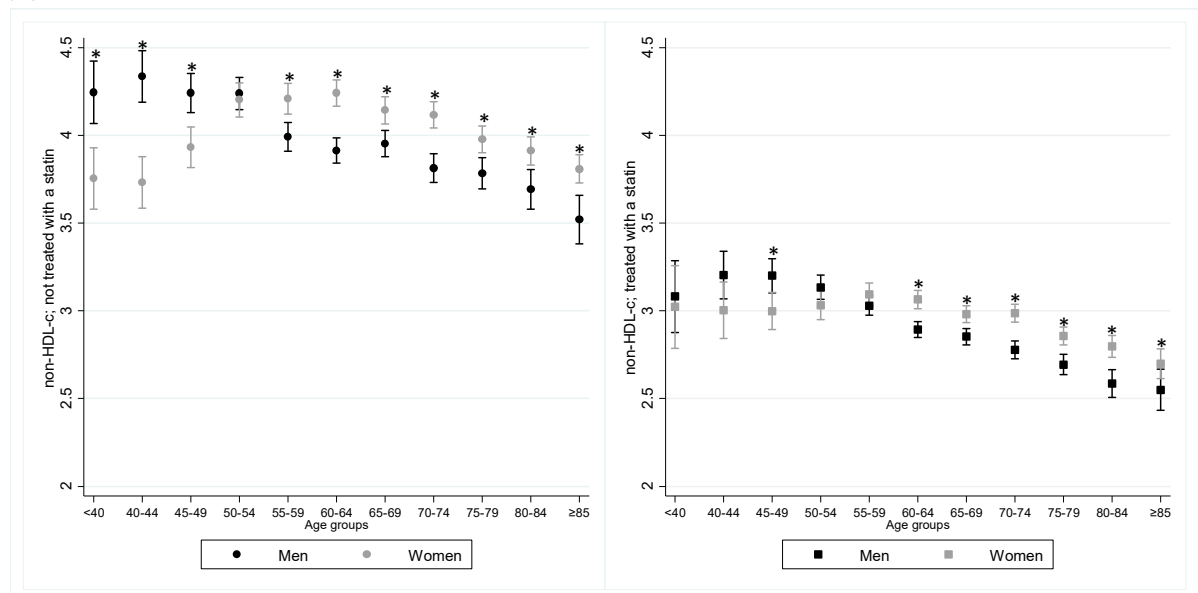

Figure S2: Mean lipid levels with 95% CIs for men and women per age group in those not treated (left) and treated with a statin (right) of (A) total cholesterol (TC) and (B) non-HDL cholesterol. Cholesterol measurements are in mmol/L. All values are adjusted for body mass index (BMI); TG values are additionally adjusted for glycated hemoglobin A1c. \* $p < 0.05$  between men and women.
